# Supplementary material for: A series of pillar-layer metal–organic frameworks based on 5-aminoisophthalic acid and 4,4′-bipyridine
Source: Royal Society of Chemistry journal article supplement (doi:10.1039/c1dt11304f), 2011-11-23
Supplement: c1dt11304f.pdf [file c1dt11304f.pdf]

## Supporting Information

### A series of pillar-layer metal-organic frameworks based on 5-aminoisophthalic acid and 4,4'-bipyridine†

Hai-Ning Wang, Xing Meng, Chao Qin, Xin-Long Wang\*, Guang-Sheng Yang and Zhong-Min Su\*

*Institute of Functional Material Chemistry, Key Lab of Polyoxometalate Science of Ministry of Education, Faculty of Chemistry, Northeast Normal University, Changchun, 130024, People's Republic of China*

\*Corresponding author. Tel.: (+86)-431-85099108.

E-mail address: zmsu@nenu.edu.cn

#### Caution:

In complex **2**, the Cu1 atom and the 5-aip ligand lie on a mirror plane and the bpy ligand lies across a mirror plane.

In complex **3**, the Co1 atom and the 5-aip ligand lie on a mirror plane and the bpy ligand lies across a mirror plane.

In complex **4**, the Cd1 atom lies on a mirror plane and the bpy ligand lies disordered about a site with  $2/m$  symmetry.

In complex **1a**, the Cd1 atom and the 5-aip ligand lie on a mirror plane and the bpy ligand lies across a mirror plane.

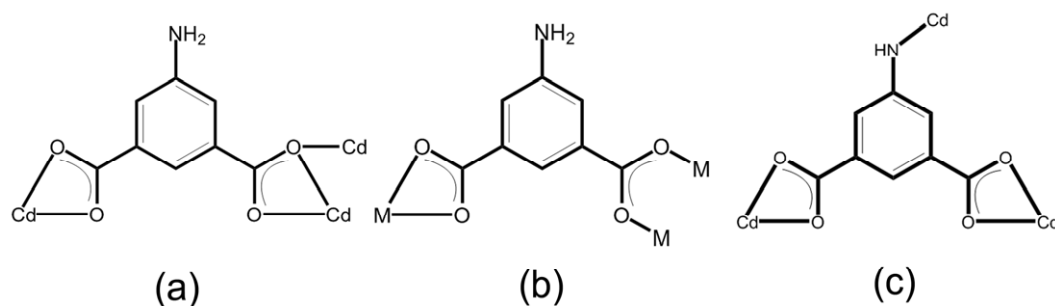

**Scheme. S1** Three kinds of coordination modes of 5-aip.

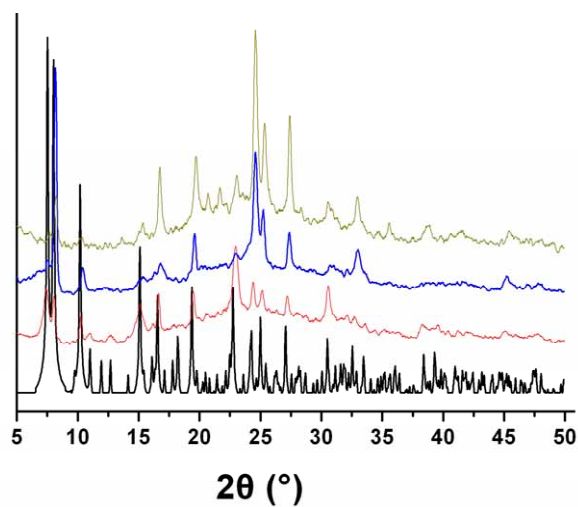

**Fig. S1** Experimental and simulated powder X-Ray diffraction patterns for **1** (black: simulated; red: **1**; blue: **1b**; dark yellow: **1c**).

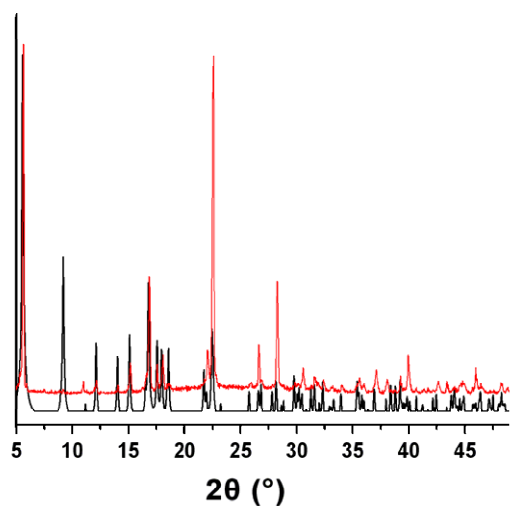

**Fig. S2** Experimental and simulated powder X-Ray diffraction patterns for **4** (black: simulated; red: experimental).

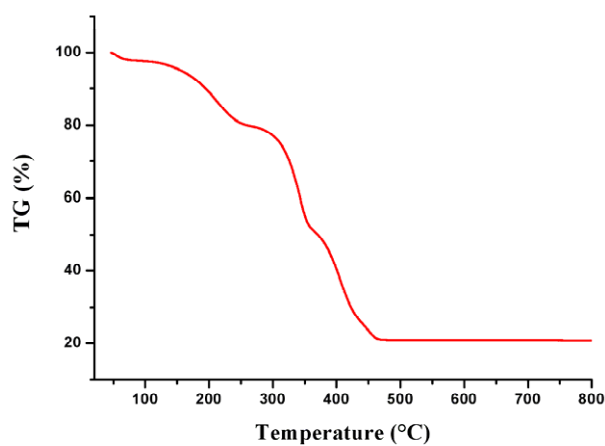

**Fig. S3** TG profile of **1**.

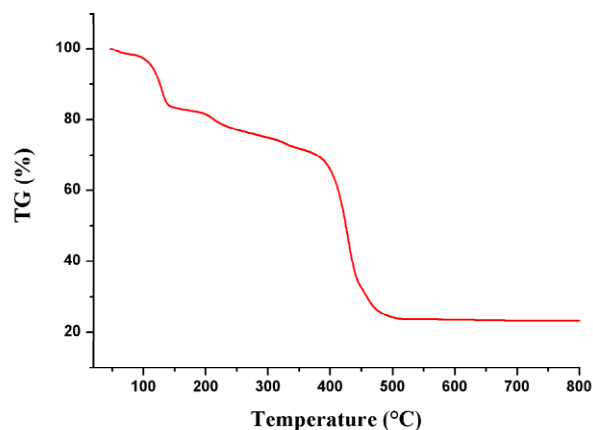

**Fig. S4** TG profile of **4**.

### Description of **1b**

Crystal data for **1a**:  $C_{22.1}H_{29.1}CdN_3O_{8.1}$ , molecular formula  $[Cd(5\text{-aip})(bpy)] \cdot 4.1CH_3OH$ ,  $M_r = 579.09$ , orthorhombic, space group  $Pbam$ ,  $a = 14.296(4) \text{ \AA}$ ,  $b = 17.317(5) \text{ \AA}$ ,  $c = 11.714(6) \text{ \AA}$ ,  $V = 2900(2) \text{ \AA}^3$ ,  $Z = 4$ ,  $\rho_{\text{calcd}} = 1.326 \text{ g cm}^{-3}$ , 2696 unique ( $R_{\text{int}} = 0.0422$ ),  $R_1 = 0.0580$  and  $wR_2 = 0.1737 [I > 2\sigma(I)]$ , final  $R_1 = 0.0635$  and  $wR_2 = 0.1785$  for all data. A total of 13993 data were measured in the range  $1.85 < \theta < 25.04^\circ$ . CCDC 832908. Elemental Anal. Calcd for  $C_{22.1}H_{29.1}CdN_3O_{8.1}$  (579.09): C, 45.86; H, 5.07; N, 7.26. Anal. Found: C, 45.80; H, 5.12; N, 7.35%.

### Adsorption and desorption of $I_2$ experiment:

In the adsorption experimental process, the crystals of **1** were initially immersed in  $I_2$  vapor, methanol and dichloromethane solution of  $I_2$  (8 mL, 0.01 mol/L) in a sealed vial at room temperature. After 24 h, the products (**1c**) were filtered and washed with sufficient methanol for six times. The products were finally immersed into fresh methanol for convenient observation.

In the delivery experimental process, the brown crystals of **1c** were immersed in fresh methanol and dichloromethane solution (8 mL) in a sealed vial at room temperature. After 72h, the moist potassium iodide-starch test paper was used to confirm the release of  $I_2$ .

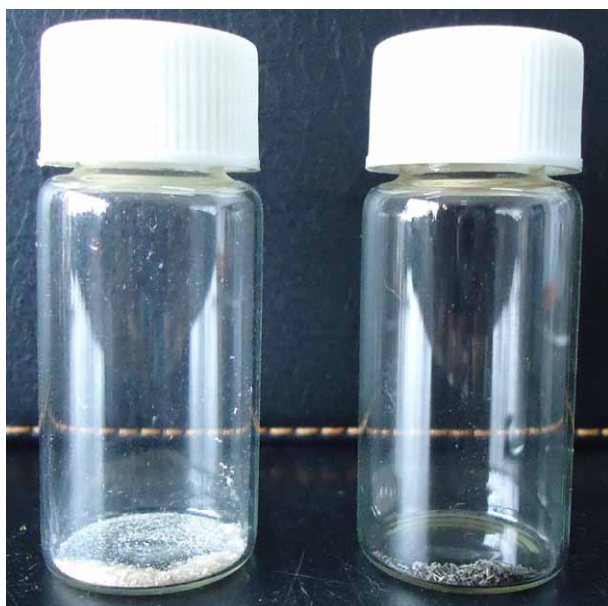

**Fig. S5** Photographs showing the color change of bulk samples of **1** before and after I<sub>2</sub> adsorption in the air at room temperature.

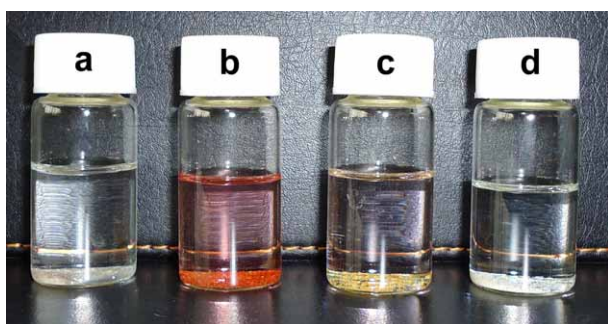

**Fig. S6** Adsorption and delivery photographs bulk samples of **1** in dichloromethane solution at room temperature: (a) samples before adsorption; (b) samples immersed in the solution of I<sub>2</sub> for 24h; (c) samples releasing I<sub>2</sub> in fresh dichloromethane for 48h; (d) samples releasing I<sub>2</sub> in fresh dichloromethane for 72h.

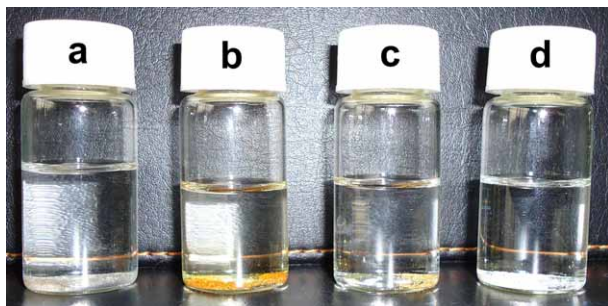

**Fig. S7** Adsorption and delivery photographs bulk samples of **1** in methanol solution at room temperature: (a) samples before adsorption; (b) samples immersed in the solution of I<sub>2</sub> for 24h; (c) samples releasing I<sub>2</sub> in fresh methanol for 48h; (d) samples

releasing  $I_2$  in fresh methanol for 72h.

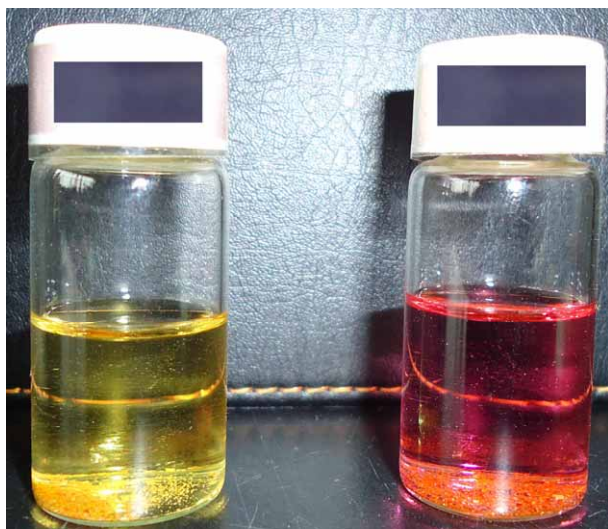

**Fig. S8** the color of methanol (left) and dichloromethane (right) used for immersing **1c** and the color change of moist potassium iodide-starch test paper (top).
